# Supplementary material for: Protective effects of the neuropeptides PACAP, substance P and the somatostatin analogue octreotide in retinal ischemia: a metabolomic analysis
Source: Royal Society of Chemistry journal article supplement (doi:10.1039/c3mb70362b), 2014-01-28

**Suppl. Fig. 1.** Representative *gel electrophoresis of qPCR products*.

**Suppl. Fig. 2.** Lipid peroxidation and pro-inflammatory markers, as assessed using untargeted metabolomic analyses. Values are expressed as mean  $\pm$  SEM (n = 5) of the fold change over non-ischemic retinas (broken lines).  $^{\S}P < 0.01$ ;  $^{\S\S}P < 0.001$ ;  $^{\S\S\S}P < 0.0001$  against non-ischemic controls;  $*P < 0.01$ ;  $**P < 0.001$ ;  $***P < 0.0001$  against untreated ischemic retinas, ANOVA.

**Suppl. Fig. 3.** Arginine-citrulline-ornithine nitric oxide-related metabolism and secondary messenger metabolites (including cyclic AMP, inositol triphosphate, PIP2 and PIP3), as assessed using untargeted metabolomic analyses. Values are expressed as mean  $\pm$  SEM (n = 5) of the fold change over non-ischemic retinas (broken lines).  $^{\S}P < 0.01$ ;  $^{\S\S\S}P < 0.0001$  against non-ischemic controls;  $*P < 0.01$ ;  $**P < 0.001$ ;  $***P < 0.0001$  against untreated ischemic retinas, ANOVA.

**Suppl. Fig. 4.** Krebs cycle metabolites, as assessed using untargeted metabolomic analyses. Values are expressed as mean  $\pm$  SEM (n = 5) of the fold change over non-ischemic retinas (broken lines).  $^{\S}P < 0.01$ ;  $^{\S\S\S}P < 0.0001$  against non-ischemic controls;  $*P < 0.01$ ;  $**P < 0.001$ ;  $***P < 0.0001$  against untreated ischemic retinas, ANOVA.

**Suppl. Fig. 5.** Purine metabolism, as assessed using untargeted metabolomic analyses. Values are expressed as mean  $\pm$  SEM (n = 5) of the fold change over non-ischemic retinas (broken lines).  $^{\S}P < 0.01$ ;  $^{\S\S\S}P < 0.0001$  against non-ischemic controls;  $*P < 0.01$ ;  $***P < 0.0001$  against untreated ischemic retinas, ANOVA.

marker (bp) casp3 vegfa gapdh

400

300

200

100

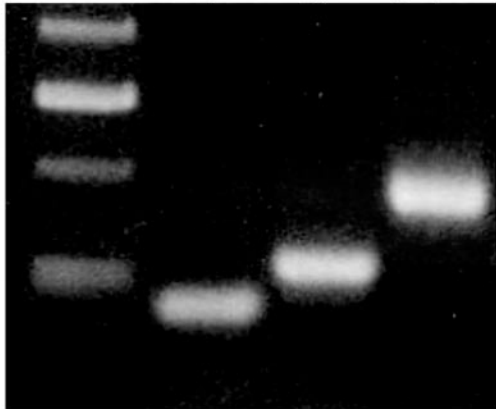

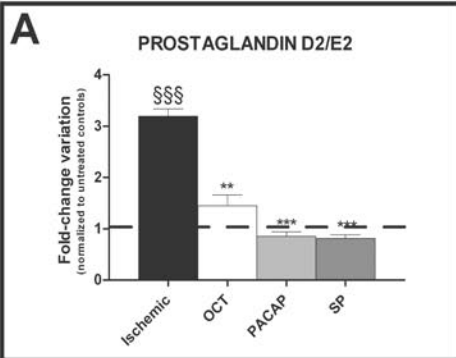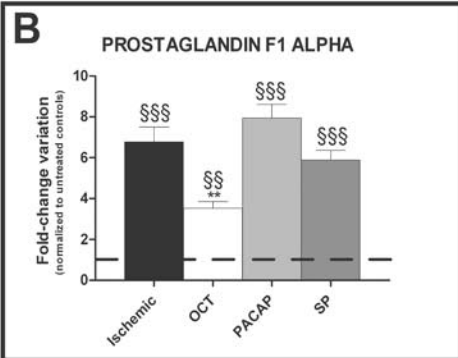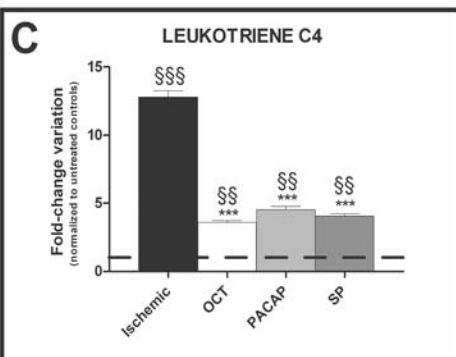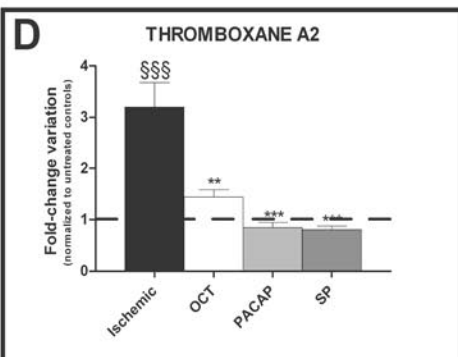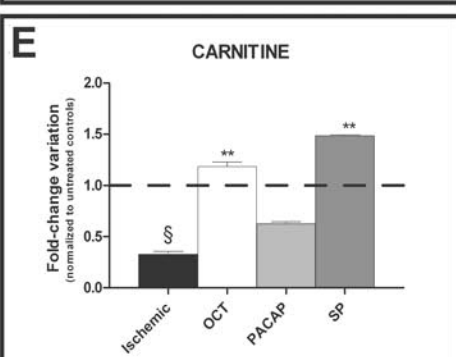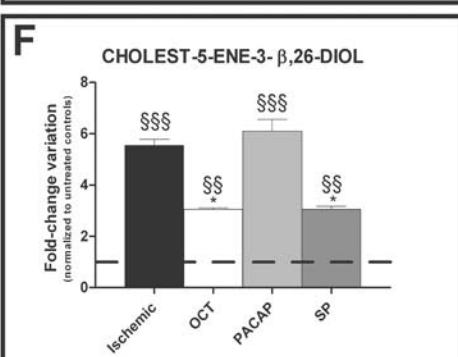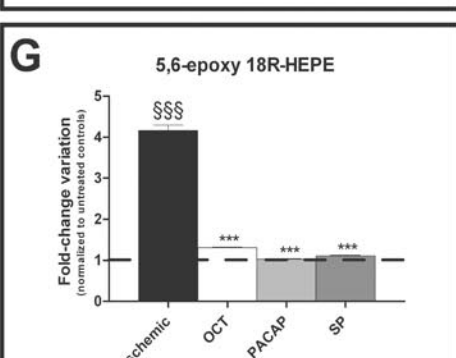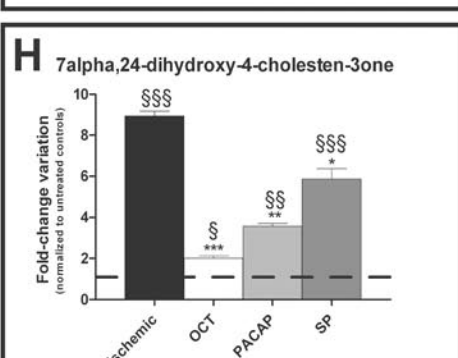

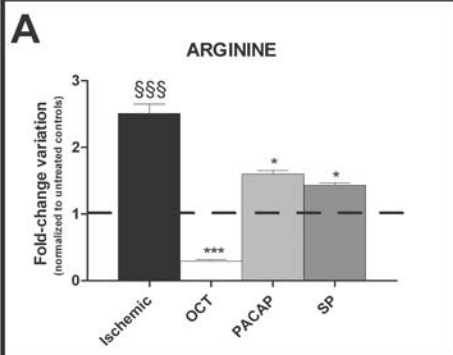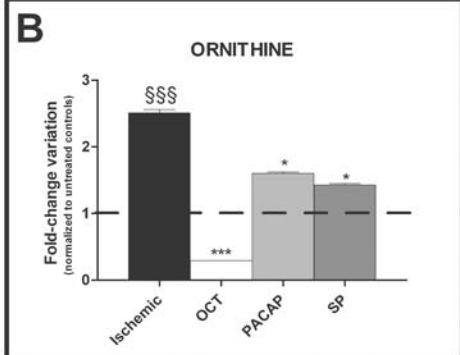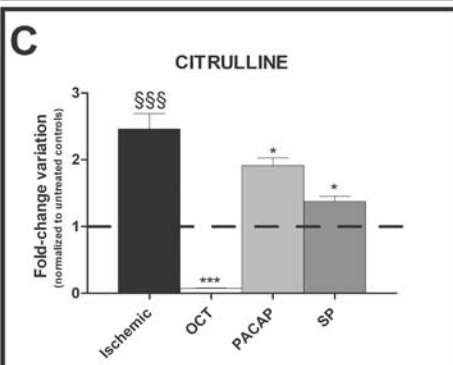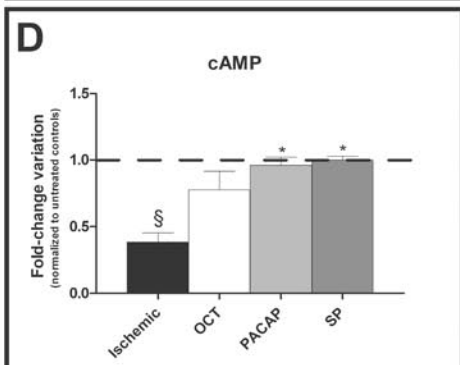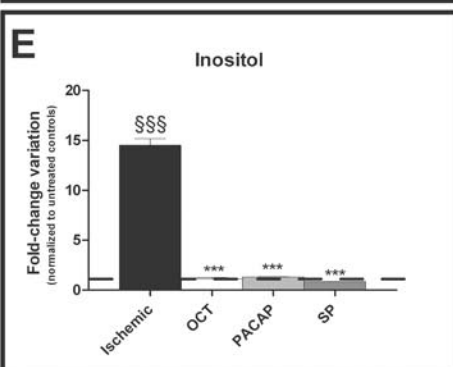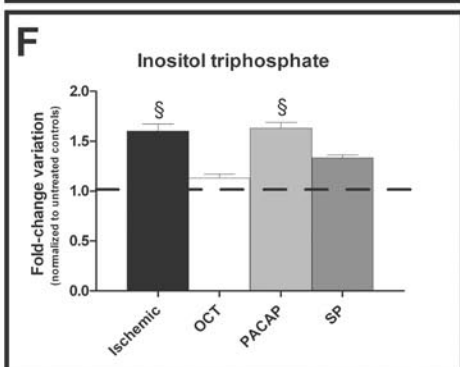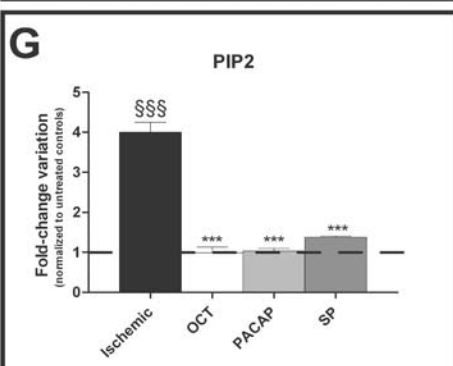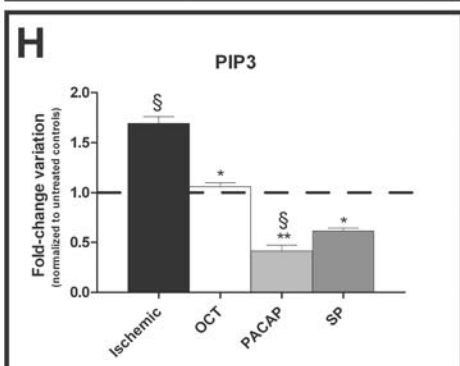



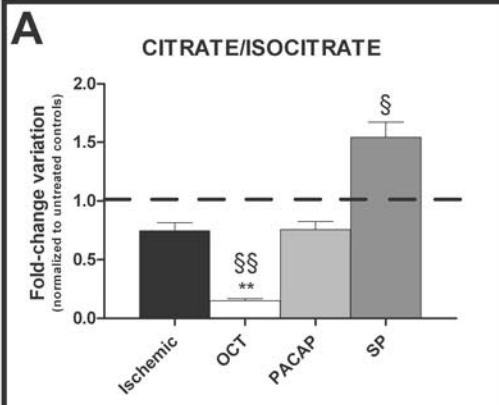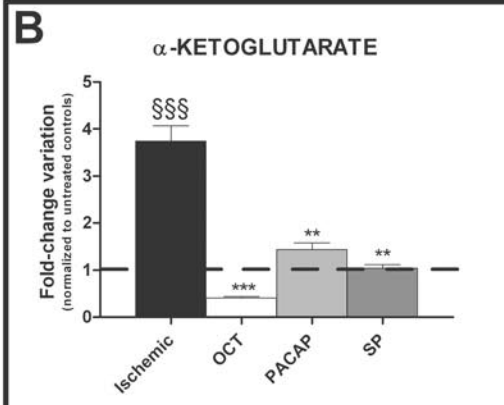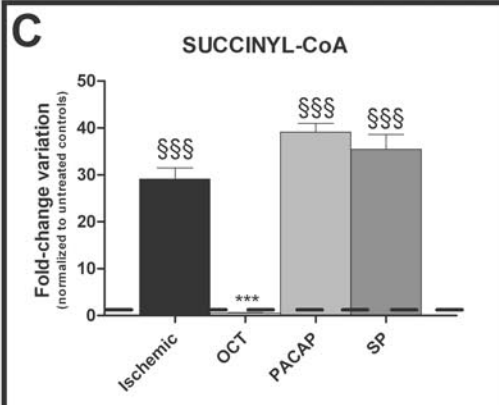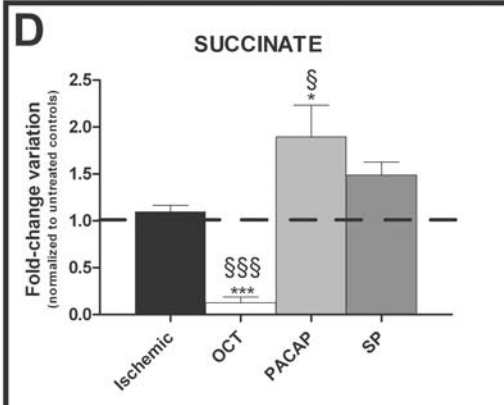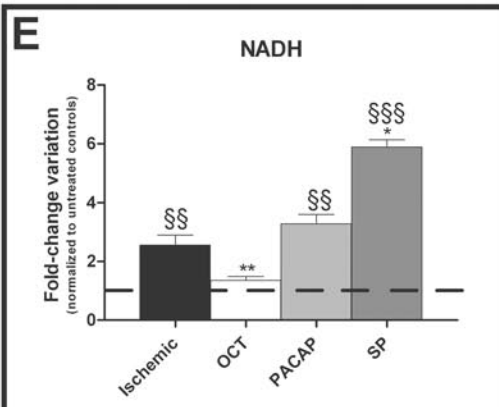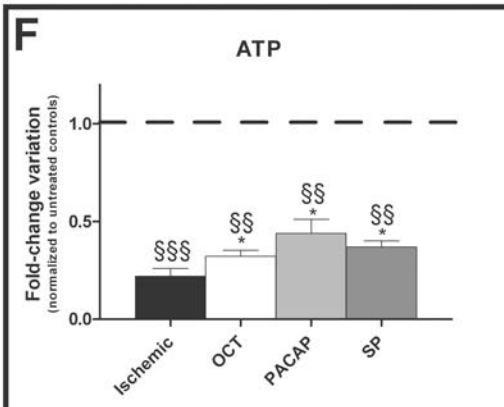

**A****ADENINE**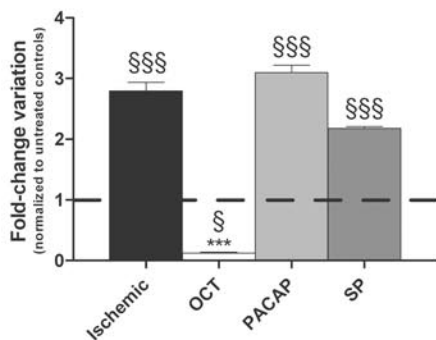**B****ADENOSINE**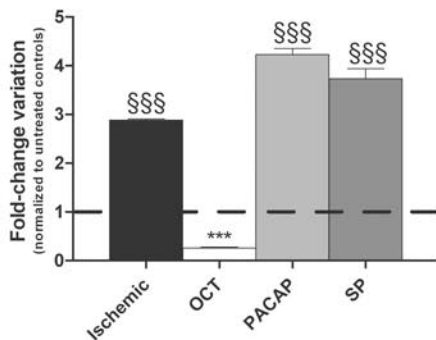**C****HYPOXANTHINE**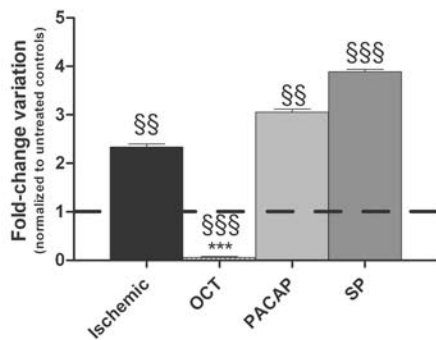**D****INOSINE**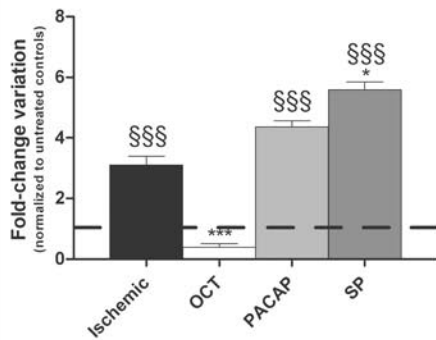**E****AMP**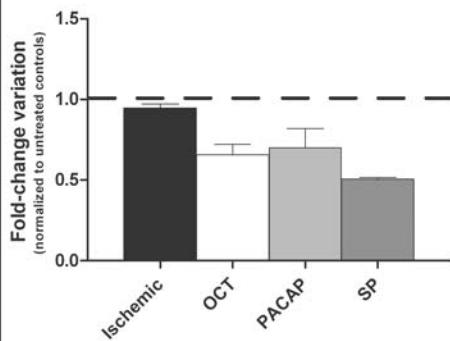**F****IMP**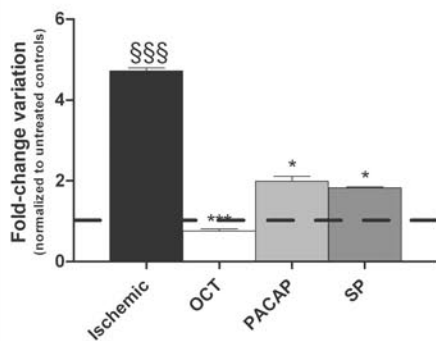

# Glutathione m/z: 306.0735-306.0796

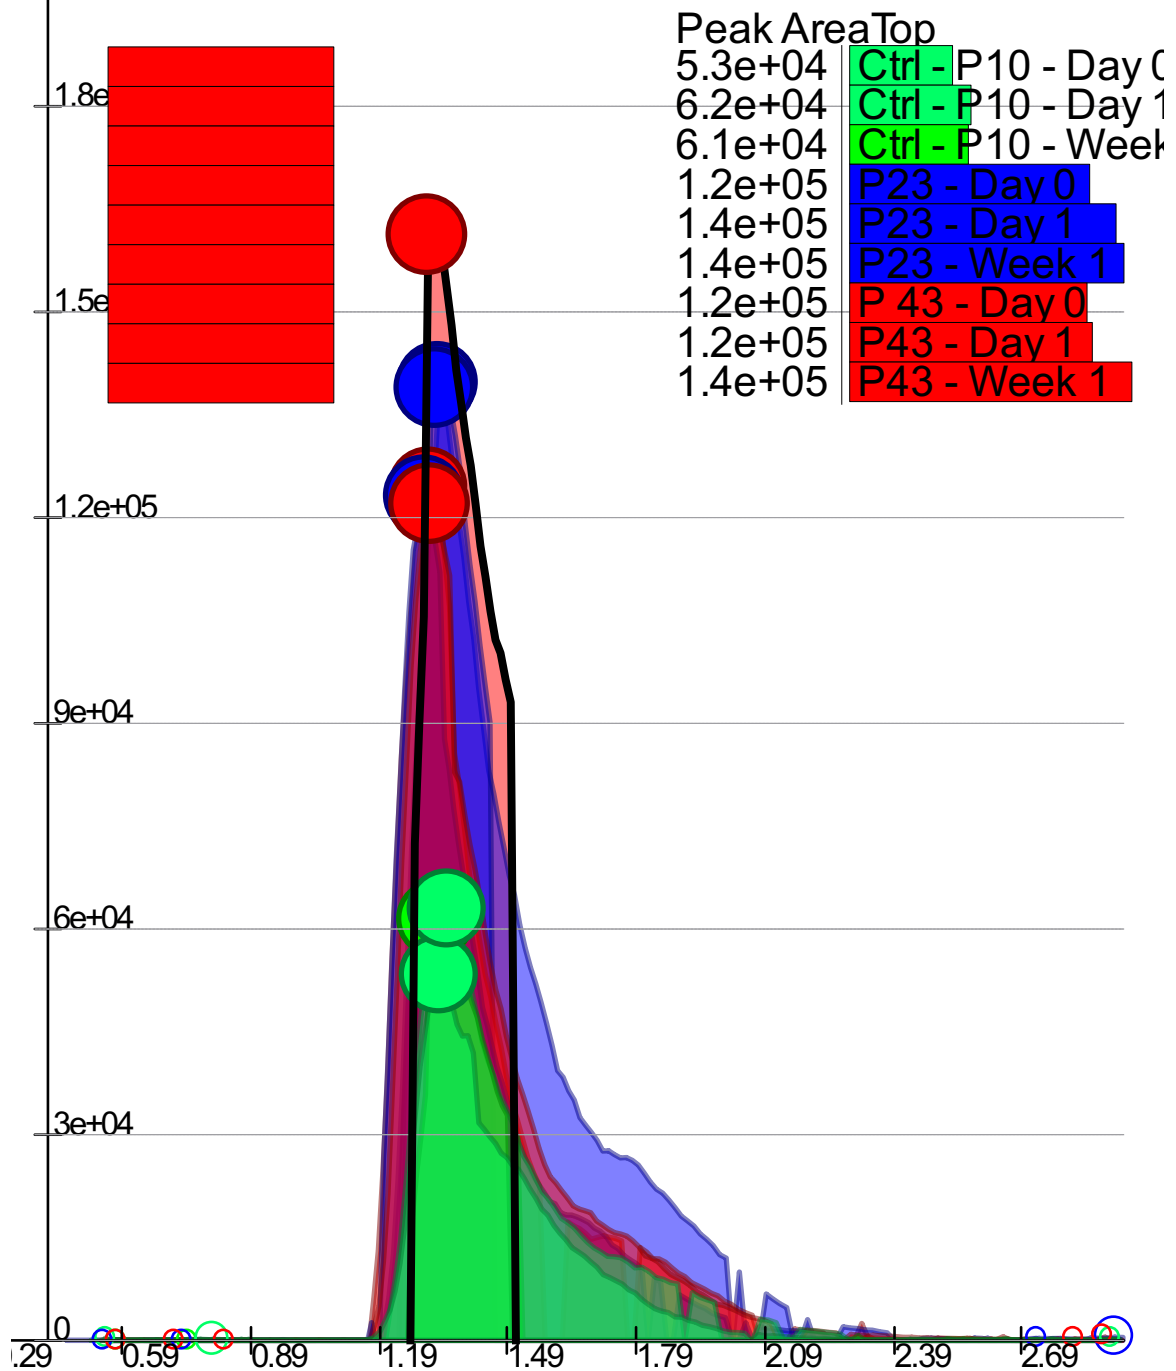

Supplement: c3mb70362b1.pdf [file c3mb70362b1.pdf]
